# Supplementary material for: A chromosomal-scale genome assembly of Tectona grandis reveals the importance of tandem gene duplication and enables discovery of genes in natural product biosynthetic pathways
Source: PubMed Central journal article supplement (PMC6394206; doi:10.1093/gigascience/giz005), 2019-01-30

# GigaScience

## A chromosomal-scale genome assembly of *Tectona grandis* enables discovery of natural product biosynthetic pathway genes key to development of sustainable teak production

--Manuscript Draft--

|                                                      |                                                                                                                                                                                                                                                                                                                                                                                                                                                                                                                                                                                                                                                                                                                                                                                                                                                                                                                                                                                                                                                                                                                                                                                                                                                                                                                                                                                                                                                                                                                                                                                                                                                                                                                                                                                                                                                                                                                                        |                     |
|------------------------------------------------------|----------------------------------------------------------------------------------------------------------------------------------------------------------------------------------------------------------------------------------------------------------------------------------------------------------------------------------------------------------------------------------------------------------------------------------------------------------------------------------------------------------------------------------------------------------------------------------------------------------------------------------------------------------------------------------------------------------------------------------------------------------------------------------------------------------------------------------------------------------------------------------------------------------------------------------------------------------------------------------------------------------------------------------------------------------------------------------------------------------------------------------------------------------------------------------------------------------------------------------------------------------------------------------------------------------------------------------------------------------------------------------------------------------------------------------------------------------------------------------------------------------------------------------------------------------------------------------------------------------------------------------------------------------------------------------------------------------------------------------------------------------------------------------------------------------------------------------------------------------------------------------------------------------------------------------------|---------------------|
| <b>Manuscript Number:</b>                            | GIGA-D-18-00458                                                                                                                                                                                                                                                                                                                                                                                                                                                                                                                                                                                                                                                                                                                                                                                                                                                                                                                                                                                                                                                                                                                                                                                                                                                                                                                                                                                                                                                                                                                                                                                                                                                                                                                                                                                                                                                                                                                        |                     |
| <b>Full Title:</b>                                   | A chromosomal-scale genome assembly of <i>Tectona grandis</i> enables discovery of natural product biosynthetic pathway genes key to development of sustainable teak production                                                                                                                                                                                                                                                                                                                                                                                                                                                                                                                                                                                                                                                                                                                                                                                                                                                                                                                                                                                                                                                                                                                                                                                                                                                                                                                                                                                                                                                                                                                                                                                                                                                                                                                                                        |                     |
| <b>Article Type:</b>                                 | Data Note                                                                                                                                                                                                                                                                                                                                                                                                                                                                                                                                                                                                                                                                                                                                                                                                                                                                                                                                                                                                                                                                                                                                                                                                                                                                                                                                                                                                                                                                                                                                                                                                                                                                                                                                                                                                                                                                                                                              |                     |
| <b>Funding Information:</b>                          | US NSF (IOS-1444499)                                                                                                                                                                                                                                                                                                                                                                                                                                                                                                                                                                                                                                                                                                                                                                                                                                                                                                                                                                                                                                                                                                                                                                                                                                                                                                                                                                                                                                                                                                                                                                                                                                                                                                                                                                                                                                                                                                                   | Prof. C Robin Buell |
|                                                      | Hatch funds (NA)                                                                                                                                                                                                                                                                                                                                                                                                                                                                                                                                                                                                                                                                                                                                                                                                                                                                                                                                                                                                                                                                                                                                                                                                                                                                                                                                                                                                                                                                                                                                                                                                                                                                                                                                                                                                                                                                                                                       | Prof. C Robin Buell |
| <b>Abstract:</b>                                     | <p><b>Background</b></p> <p>Teak, a member of the Lamiaceae family, produces one of the most expensive hardwoods in the world. High demand coupled with deforestation have caused a decrease in natural teak forests, and future supplies will be reliant on teak plantations. Hence, selection of teak tree varieties for clonal propagation with superior growth performance is of great importance, and access to high-quality genetic and genomic resources can accelerate the selection process by identifying genes underlying desired traits.</p> <p><b>Findings</b></p> <p>To facilitate teak research and variety improvement, we generated a highly contiguous, chromosomal-scale genome assembly using high-coverage PacBio long reads coupled with high-throughput chromatin conformation capture (Hi-C). Of the 18 teak chromosomes, we generated 17 near-complete pseudomolecules with one chromosome present as two chromosome arm scaffolds. Genome annotation yielded 31,168 genes encoding 46,826 gene models, of which, 39,930 and 41,155 had Pfam domains and expression evidence, respectively. We identified 14 clusters of tandem-duplicated terpene synthases (TPSs), genes central to the biosynthesis of terpenes which are involved in plant defense and pollinator attraction. Transcriptome analysis revealed 10 TPSs highly expressed in woody tissues, of which, 8 were in tandem, revealing the importance of resolving tandemly duplicated genes and the quality of the assembly and annotation. We also validated the enzymatic activity of four TPSs to demonstrate the function of key TPSs.</p> <p><b>Conclusions</b></p> <p>In summary, this high-quality chromosomal-scale assembly and functional annotation of the teak genome will facilitate the discovery of candidate genes related to traits critical for sustainable production of teak and for anti-insecticidal natural products.</p> |                     |
| <b>Corresponding Author:</b>                         | C Robin Buell<br>Michigan State University<br>East Lansing, Michigan UNITED STATES                                                                                                                                                                                                                                                                                                                                                                                                                                                                                                                                                                                                                                                                                                                                                                                                                                                                                                                                                                                                                                                                                                                                                                                                                                                                                                                                                                                                                                                                                                                                                                                                                                                                                                                                                                                                                                                     |                     |
| <b>Corresponding Author Secondary Information:</b>   |                                                                                                                                                                                                                                                                                                                                                                                                                                                                                                                                                                                                                                                                                                                                                                                                                                                                                                                                                                                                                                                                                                                                                                                                                                                                                                                                                                                                                                                                                                                                                                                                                                                                                                                                                                                                                                                                                                                                        |                     |
| <b>Corresponding Author's Institution:</b>           | Michigan State University                                                                                                                                                                                                                                                                                                                                                                                                                                                                                                                                                                                                                                                                                                                                                                                                                                                                                                                                                                                                                                                                                                                                                                                                                                                                                                                                                                                                                                                                                                                                                                                                                                                                                                                                                                                                                                                                                                              |                     |
| <b>Corresponding Author's Secondary Institution:</b> |                                                                                                                                                                                                                                                                                                                                                                                                                                                                                                                                                                                                                                                                                                                                                                                                                                                                                                                                                                                                                                                                                                                                                                                                                                                                                                                                                                                                                                                                                                                                                                                                                                                                                                                                                                                                                                                                                                                                        |                     |
| <b>First Author:</b>                                 | Dongyan Zhao                                                                                                                                                                                                                                                                                                                                                                                                                                                                                                                                                                                                                                                                                                                                                                                                                                                                                                                                                                                                                                                                                                                                                                                                                                                                                                                                                                                                                                                                                                                                                                                                                                                                                                                                                                                                                                                                                                                           |                     |
| <b>First Author Secondary Information:</b>           |                                                                                                                                                                                                                                                                                                                                                                                                                                                                                                                                                                                                                                                                                                                                                                                                                                                                                                                                                                                                                                                                                                                                                                                                                                                                                                                                                                                                                                                                                                                                                                                                                                                                                                                                                                                                                                                                                                                                        |                     |

|                                                                                                                                                                                                                                                                                                                                                                                                                              |                    |
|------------------------------------------------------------------------------------------------------------------------------------------------------------------------------------------------------------------------------------------------------------------------------------------------------------------------------------------------------------------------------------------------------------------------------|--------------------|
| <b>Order of Authors:</b>                                                                                                                                                                                                                                                                                                                                                                                                     | Dongyan Zhao       |
|                                                                                                                                                                                                                                                                                                                                                                                                                              | John P. Hamilton   |
|                                                                                                                                                                                                                                                                                                                                                                                                                              | Wajid Waheed Bhat  |
|                                                                                                                                                                                                                                                                                                                                                                                                                              | Sean R. Johnson    |
|                                                                                                                                                                                                                                                                                                                                                                                                                              | Grant T. Godden    |
|                                                                                                                                                                                                                                                                                                                                                                                                                              | Taliesin J. Kinser |
|                                                                                                                                                                                                                                                                                                                                                                                                                              | Benoît Boachon     |
|                                                                                                                                                                                                                                                                                                                                                                                                                              | Natalia Dudareva   |
|                                                                                                                                                                                                                                                                                                                                                                                                                              | Douglas E. Soltis  |
|                                                                                                                                                                                                                                                                                                                                                                                                                              | Pamela S. Soltis   |
|                                                                                                                                                                                                                                                                                                                                                                                                                              | Bjoern Hamberger   |
|                                                                                                                                                                                                                                                                                                                                                                                                                              | C Robin Buell      |
| <b>Order of Authors Secondary Information:</b>                                                                                                                                                                                                                                                                                                                                                                               |                    |
| <b>Additional Information:</b>                                                                                                                                                                                                                                                                                                                                                                                               |                    |
| <b>Question</b>                                                                                                                                                                                                                                                                                                                                                                                                              | <b>Response</b>    |
| Are you submitting this manuscript to a special series or article collection?                                                                                                                                                                                                                                                                                                                                                | No                 |
| <b>Experimental design and statistics</b><br><br>Full details of the experimental design and statistical methods used should be given in the Methods section, as detailed in our <a href="#">Minimum Standards Reporting Checklist</a> . Information essential to interpreting the data presented should be made available in the figure legends.<br><br>Have you included all the information requested in your manuscript? | Yes                |
| <b>Resources</b><br><br>A description of all resources used, including antibodies, cell lines, animals and software tools, with enough information to allow them to be uniquely identified, should be included in the Methods section. Authors are strongly encouraged to cite <a href="#">Research Resource Identifiers</a> (RRIDs) for antibodies, model organisms and tools, where possible.                              | Yes                |

|                                                                                                                                                                                                                                                                                                                                                                                                                                                                                                                                                         |            |
|---------------------------------------------------------------------------------------------------------------------------------------------------------------------------------------------------------------------------------------------------------------------------------------------------------------------------------------------------------------------------------------------------------------------------------------------------------------------------------------------------------------------------------------------------------|------------|
| <p>Have you included the information requested as detailed in our <a href="#">Minimum Standards Reporting Checklist</a>?</p>                                                                                                                                                                                                                                                                                                                                                                                                                            |            |
| <p><b>Availability of data and materials</b></p> <p>All datasets and code on which the conclusions of the paper rely must be either included in your submission or deposited in <a href="#">publicly available repositories</a> (where available and ethically appropriate), referencing such data using a unique identifier in the references and in the “Availability of Data and Materials” section of your manuscript.</p> <p>Have you have met the above requirement as detailed in our <a href="#">Minimum Standards Reporting Checklist</a>?</p> | <p>Yes</p> |

1  
2  
3  
4  
5 **A chromosomal-scale genome assembly of *Tectona grandis* enables discovery of natural**  
6 **product biosynthetic pathway genes key to development of sustainable teak production**  
7  
8  
9

10  
11 Dongyan Zhao<sup>1</sup>, John P. Hamilton<sup>1</sup>, Wajid Waheed Bhat<sup>2,3</sup>, Sean R. Johnson<sup>2</sup>, Grant T. Godden<sup>4</sup>,  
12 Taliesin J. Kinser<sup>4,5</sup>, Benoît Boachon<sup>6</sup>, Natalia Dudareva<sup>6</sup>, Douglas E. Soltis<sup>4,5</sup>, Pamela S. Soltis<sup>4</sup>,  
13 Bjoern Hamberger<sup>2</sup>, C. Robin Buell<sup>1,7,8,\*</sup>  
14

15  
16  
17 <sup>1</sup>Department of Plant Biology, Michigan State University, East Lansing, MI 48824, USA

18  
19 <sup>2</sup>Department of Biochemistry and Molecular Biology, Michigan State University, East Lansing,  
20 MI 48824, USA

21  
22 <sup>3</sup>Department of Pharmacology and Toxicology, Michigan State University, East Lansing, MI  
23 48824, USA

24  
25 <sup>4</sup>Florida Museum of Natural History, University of Florida, Gainesville, FL 32611, USA

26  
27 <sup>5</sup>Department of Biology, University of Florida, Gainesville, FL 32611, USA

28  
29 <sup>6</sup>Department of Biochemistry, Purdue University, West Lafayette, IN 47907, USA

30  
31 <sup>7</sup>Plant Resilience Institute, Michigan State University, East Lansing, MI 48872, USA

32  
33 <sup>8</sup>MSU AgBioResearch, Michigan State University, East Lansing, MI 48872, USA

34  
35 **Email addresses:** Dongyan Zhao <zhaodon4@msu.edu>, John P. Hamilton <jham@msu.edu>,  
36 Wajid Waheed Bhat <bhatwaji@msu.edu>, Sean R. Johnson <seanRjohnson@gmail.com>,  
37 Grant T. Godden <g0ddengr@ufl.edu>, Taliesin J. Kinser <tkinser@ufl.edu>, Benoît Boachon  
38 <benoit.boachon@gmail.com>, Natalia Dudareva <dudareva@purdue.edu>, Douglas E. Soltis  
39 <dsoltis@ufl.edu>, Pamela S. Soltis <psoltis@flmnh.ufl.edu>, Bjoern Hamberger  
40 <hamberge@msu.edu>, C. Robin Buell <buell@msu.edu>  
41  
42  
43  
44  
45

46  
47 \*Correspondence should be addressed to: C. Robin Buell, buell@msu.edu  
48  
49

50  
51 **Manuscript type: Data note**  
52

53 Note: Reviewers can access the genome sequence and annotation using the following temporary  
54 URL: <https://datadryad.org/review?doi=doi:10.5061/dryad.77b2422>  
55  
56  
57  
58  
59  
60  
61  
62  
63  
64  
65

1  
2  
3  
4  
5  
6  
7  
8  
9  
10  
11  
12  
13  
14  
15  
16  
17  
18  
19  
20  
21  
22  
23  
24  
25  
26  
27  
28  
29  
30  
31  
32  
33  
34  
35  
36  
37  
38  
39  
40  
41  
42  
43  
44  
45  
46  
47  
48  
49  
50  
51  
52  
53  
54  
55  
56  
57  
58  
59  
60  
61  
62  
63  
64  
65

1 **Abstract**

2 **Background:** Teak, a member of the Lamiaceae family, produces one of the most expensive  
3 hardwoods in the world. High demand coupled with deforestation have caused a decrease in  
4 natural teak forests, and future supplies will be reliant on teak plantations. Hence, selection of  
5 teak tree varieties for clonal propagation with superior growth performance is of great  
6 importance, and access to high-quality genetic and genomic resources can accelerate the  
7 selection process by identifying genes underlying desired traits.

8 **Findings:** To facilitate teak research and variety improvement, we generated a highly  
9 contiguous, chromosomal-scale genome assembly using high-coverage PacBio long reads  
10 coupled with high-throughput chromatin conformation capture (Hi-C). Of the 18 teak  
11 chromosomes, we generated 17 near-complete pseudomolecules with one chromosome present  
12 as two chromosome arm scaffolds. Genome annotation yielded 31,168 genes encoding 46,826  
13 gene models, of which, 39,930 and 41,155 had Pfam domains and expression evidence,  
14 respectively. We identified 14 clusters of tandem-duplicated terpene synthases (TPSs), genes  
15 central to the biosynthesis of terpenes which are involved in plant defense and pollinator  
16 attraction. Transcriptome analysis revealed 10 TPSs highly expressed in woody tissues, of  
17 which, 8 were in tandem, revealing the importance of resolving tandemly duplicated genes and  
18 the quality of the assembly and annotation. We also validated the enzymatic activity of four  
19 TPSs to demonstrate the function of key TPSs.

20 **Conclusions:** In summary, this high-quality chromosomal-scale assembly and functional  
21 annotation of the teak genome will facilitate the discovery of candidate genes related to traits  
22 critical for sustainable production of teak and for anti-insecticidal natural products.

23  
24 **Keywords:** Teak, chromosomal-scale assembly, terpene synthases, tandem-duplicated genes,

## 25 **Data Description**

### 26 **Introduction**

27 Teak (*Tectona grandis* L.f.;  $2n = 2x = 36$ ), a member of the angiosperm family Lamiaceae,  
28 produces timber of high value due to its durability, hardness, appearance, and resistance to biotic  
29 and abiotic stresses. Teak is one of the most expensive hardwoods in the world, with an average  
30 price for high-quality logs ranging from \$600-1000/m<sup>3</sup> USD [1]. High demand coupled with  
31 deforestation have caused a decrease in natural teak forests, and future supplies will be reliant on  
32 teak plantations. Hence, selection of teak tree varieties for clonal propagation with superior  
33 growth performance is of great importance, and access to high-quality genetic and genomic  
34 resources can accelerate the selection process by identifying genes underlying desired traits. The  
35 only available genome assembly for teak (hereafter referred to as the “released assembly”) was  
36 completed using short-reads and low-coverage (7x) nanopore long reads [2]; while improved  
37 compared to other short-read assembled plant genomes, the released assembly is still highly  
38 fragmented with an N50 scaffold length of 358 kbp.

### 39 **DNA extraction and genome sequencing**

40 Teak seeds were obtained from Sheffield's Seed Company [3]. High molecular weight DNA was  
41 extracted from young leaves of a 2-week-old plant grown in the greenhouse using a modified  
42 CTAB method [4]. Long read sequencing was done using Pacific Biosciences RSII and Sequel  
43 single-molecule sequencers at the University of Delaware Sequencing & Genotyping Center.  
44 Briefly, SMRTbell DNA libraries were constructed from genomic DNA using SMRTbell  
45 Template Prep Kit 1.0-SPv3 as per the manufacturer's instructions (Pacific Biosciences, Menlo  
46 Park, CA). The library was size selected using the BluePippin Size-selection system and protocol  
47 for 15 Kbp size selection (Sage Science, Amherst, MA). Following size selection, the average  
48 library fragment size was 25 kb based on the Fragment Analyzer sizing profile (Advanced  
49 Analytical Technologies, Arkeny, IA). The library was sequenced for 6 hours on 10 SMRT cells  
50 using P6-C4 chemistry on the PacBio RS II instrument (Pacific Biosciences, Menlo Park, CA)  
51 and 10 hours on 4 SMRT cells using 2.0 sequencing chemistry on the PacBio Sequel  
52 instrument (Pacific Biosciences, Menlo Park, CA). A total of ~4.7 million PacBio long reads  
53 were generated, which is an estimated ~104x coverage of the estimated 325 Mbp teak genome.  
54 Additionally, whole genome short-read sequencing libraries were generated using Illumina

1  
2  
3  
4 55 TruSeq Nano DNA Library Preparation Kit (Cat. No. FC-121-4001) and sequenced to 150-nt  
5  
6 56 paired end reads on Illumina HiSeq 4000.

7  
8 **57 Genome assembly and quality assessment**  
9

10 58 The raw reads were error-corrected (canu -correct) and trimmed (canu -trim) for low-quality  
11  
12 59 bases and reads  $\geq 1$  kb were used to generate the initial assembly (canu -assemble) with a  
13  
14 60 correctedErrorRate of 0.09% [5]. The assembly consists of 1,474 contigs with a total length of  
15  
16 61 338 Mbp, 20 Mbp larger than the released assembly (Table 1). The initial assembly was polished  
17  
18 62 using the raw PacBio reads using Arrow [6], followed by three rounds of error correction with  
19  
20 63 643.7 million Illumina short reads (570x coverage, Table 2) using Pilon [7]. A Dovetail Hi-C  
21  
22 64 library was prepared as described previously [8]. The initial PacBio assembly, shotgun reads, and  
23  
24 65 Dovetail Hi-C library reads were used as input data for scaffolding using HiRise [9]. Shotgun  
25  
26 66 and Dovetail Hi-C library sequences were aligned to the initial assembly using a modified SNAP  
27  
28 67 read mapper [10]. The separation of aligned Dovetail Hi-C read pairs were analyzed by HiRise to  
29  
30 68 produce a likelihood model for genomic distance between read pairs, and the model was used to  
31  
32 69 identify and break putative mis-joins, to score prospective joins, and make joins above a  
33  
34 70 threshold. The Hi-C scaffolding resulted in 936 scaffolds (referred to as “improved assembly”,  
35  
36 71 hereafter), with an N50 scaffold size of 18.5 Mbp, which is a 46x improvement of genome  
37  
38 72 contiguity over the released assembly (Table 3). The 19 largest scaffolds (minimum length of  
39  
40 73 8.6 Mbp) represented 90% of the assembled 338 Mbp genome; of the 18 teak chromosomes, we  
41  
42 74 generated 17 near-complete pseudomolecules with one chromosome present as two chromosome  
43  
44 75 arm scaffolds (Figure 1). The completeness of our improved assembly was also demonstrated by  
45  
46 76 the presence of tandem tracts of the telomere repeat sequence in nine of the 19 pseudomolecules;  
47  
48 77 two pseudomolecules contained telomere tracks at both ends (Figure 1). A tandem array of 5S  
49  
50 78 rRNA sequence (135 copies with each at 496 bp) was found in pseudomolecule 10  
51  
52 79 spanning  $>67.5$  kbp, highlighting the power of long reads in resolving highly repetitive  
53  
54 80 sequences. Around 98% of the whole genome shotgun reads aligned to the improved assembly,  
55  
56 81 of which, 94 - 98% of the reads were properly paired (Table 2). The representation of genic  
57  
58 82 sequences in our improved assembly was confirmed by detection of 94.4% of the Benchmarking  
59  
60 83 Universal Single-Copy Orthologs (BUSCO [11]; C:92.3%[S:82.4%,D:9.9%],F:2.1%,M:5.6%,  
61  
62 84 n:1440; Supplementary Table S1) and by alignment of 89% - 93% of transcriptome reads from  
63  
64  
65

1  
2  
3  
4 85 publicly available RNA-seq datasets derived from diverse tissues of other teak accessions  
5  
6 86 (Supplementary Table S2).

### 87 **Genome annotation**

10 88 The genome was annotated as described previously [12]. A custom repeat library (CRL) was  
11  
12 89 generated for teak by running RepeatModeler [13], excluding protein-coding genes from the  
13  
14 90 repeat library, and adding the Viridiplantae RepBase repeats. Repeatmasking revealed that  
15  
16 91 32.02% of the improved assembly was identified as repetitive sequence, 3-fold more compared  
17  
18 92 to that reported in the released assembly (11%). The improved assembly was masked using the  
19  
20 93 CRL. RNA-seq alignments were used to train the *ab initio* gene finder, Augustus [14], and gene  
21  
22 94 models were predicted on the hard-masked assembly. The predicted gene models were refined by  
23  
24 95 running PASA2 [15], followed by manual curation, yielding 31,168 genes encoding 46,826 gene  
25  
26 96 models, of which, 39,930 and 41,155 had Pfam domains and expression evidence, respectively.

### 27 97 **Detection of whole genome duplication events**

28  
29  
30 98 Whole genome duplications (WGD) can contribute to genetic innovations underlying chemical  
31  
32 99 defense against co-evolving insect herbivores, as exemplified by evidence from studies of other  
33  
34 100 plant groups (e.g., Brassicales [16]). To infer WGD events in teak, we used the DupPipe pipeline  
35  
36 101 [17] to analyze coding sequences representing the longest isoforms of genes (Supplemental  
37  
38 102 Information). Gaussian mixture models predicted three components within the observed  $K_S$   
39  
40 103 distribution of teak, with mean values at  $K_S = 0.22, 0.60, 1.36$  (Supplementary Fig. S1A). Of  
41  
42 104 these, a peak at  $K_S = 0.60$  was corroborated as a significant feature by a SiZer analysis  
43  
44 105 (Supplementary Fig. S1B), providing evidence for at least one WGD event in teak. Whether or  
45  
46 106 not this WGD event is lineage-specific or shared by other Lamiaceae is a subject of active  
47  
48 107 research.

### 49 108 **The phenylpropanoid pathway genes and their expression**

50  
51 109 Teak is known for strong wood, and we were able to identify all of the genes involved in the  
52  
53 110 phenylpropanoid pathway which leads to lignin formation (Supplementary Table S3). We  
54  
55 111 identified physical clusters of genes in lignin biosynthetic pathway based on if: 1) there were no  
56  
57 112 more than 10 genes in between on a single pseudomolecule and 2) the pairwise gene distance  
58  
59 113 was less than 100 kbp. Notably, four of the 11 core genes in the phenylpropanoid pathway were



1  
2  
3  
4 114 present in tandem copies, with shikimate O-hydroxycinnamoyltransferase (HCT) having three  
5  
6 115 tandem clusters of two copies each and one cluster of five copies (Fig. 2). For 20 of the 45 genes  
7  
8 116 in the phenylpropanoid pathway, clear neofunctionalization at the expression level was observed  
9  
10 117 for F5H, COMT, PAL, and HCT. Interestingly, cinnamyl CoA reductase (CCR), which catalyzes  
11  
12 118 the first committed step of the lignin-specific branch, was in a physical cluster with five copies  
13  
14 119 of HCT; within this physical cluster, only one of the five HCT genes (Tg16g10070) and CCR  
15 120 (Tg16g10210) were constitutively expressed in all tissues (Fig. 2).

### 17 121 **Identification of terpene synthases (TPSs) and functional verification**

19  
20 122 Terpenes are a large class of specialized metabolites involved in plant defense and pollinator  
21  
22 123 attraction [18]. Terpene synthases (TPSs) are key genes involved in terpenoid biosynthesis and  
23  
24 124 are often found in physical clusters in the genome [19]. Through sequence similarity searches, 65  
25  
26 125 TPSs were identified, of which, 41 TPSs were located in 14 tandem clusters (Supplementary  
27  
28 126 Table S4). Phylogenetic analysis of teak TPSs and those from *Arabidopsis thaliana* L. Heynh.  
29  
30 127 and *Eucalyptus grandis* W. Hill ex Maiden indicate that multiple recent species-specific tandem  
31  
32 128 duplication events contributed to an expansion in TPS number in teak, consistent with previous  
33  
34 129 findings [20] (Fig. 3; Supplementary Information). Twelve teak TPSs were expressed in stem;  
35  
36 130 seven of these are tandemly duplicated, suggesting these recent tandemly duplicated genes may  
37  
38 131 retain similar functions (Supplementary Table S4). To validate our TPS annotation,  
39  
40 132 four teak diterpene synthases (diTPSs) were amplified from leaf tissues and tested for functional  
41  
42 133 verification through transient expression in *Nicotiana benthamiana* Domin (Supplemental  
43  
44 134 Information). The results demonstrated that TgTPS6 (Tg14g12740) catalyzed the formation  
45  
46 135 of *ent*-copalyl diphosphate, while TgTPS2 (Tg02g10330) converted that product to *ent*-kaurene  
47  
48 136 in the first committed steps of gibberellic acid hormone biosynthesis (Fig. 4; Supplementary Fig.  
49  
50 137 S2). TgTPS5 (Tg05g04010) and TgTPS1 (Tg05g04000) are located adjacent to each other on the  
51  
52 138 genome and form the pathway to miltiradiene (Fig. 4), an intermediate in the biosynthesis of  
53  
54 139 defense-related specialized metabolites found in many members of Lamiaceae.

### 53 140 **Transcriptomic analysis of TPSs and cytochrome P450 enzymes**

55  
56 141 Transcriptomic analysis of diverse tissues of teak, including leaves, flowers, roots, seedling, and  
57  
58 142 branch and stem secondary xylem of different ages, revealed seven putative monoterpene  
59  
60 143 synthases from subfamily TPS-b (Fig. 5, clades I and II) and three putative sesquiterpene

1  
2  
3  
4 144 synthases from subfamily TPS-a (Fig. 5, clade III) that were highly expressed in woody tissues,  
5  
6 145 including 12- and 60-year-old branches and stems (Fig. 5). These TPSs are likely responsible for  
7  
8 146 the synthesis of defense-related compounds, including unknown, specialized metabolites that  
9  
10 147 contribute to the termite resistance and defense of wood tissues from other pests and pathogens  
11  
12 148 in teak [21].  
13  
14 149 Most specialized metabolites, including terpenes, require cytochrome P450 enzymes (CYPs) that  
15  
16 150 modify the terpene scaffold; similar to TPSs, CYPs are often found in physical clusters in the  
17  
18 151 genome [10]. Through sequence similarity searches, 377 CYP genes were identified, of which,  
19  
20 152 248 (66%) occurred in physical clusters (Supplementary Table S4). In addition, many TPSs and  
21  
22 153 CYPs were clustered together, i.e., of 65 TPSs and 377 CYPs, 20 TPSs and 31 CYPs were co-  
23  
24 154 located in 12 physical clusters. For example, a cluster on pseudomolecule 5 consisted of two  
25  
26 155 TPSs (TPS-e, TPS-c) and eight complete and two partial CYP genes (i.e., four copies of  
27  
28 156 CYP76AH, four copies of CYP71D, and two copies of CYP714G). Similar to the pattern  
29  
30 157 observed for lignin pathway genes, neofunctionalization of expression across tissues was  
31  
32 158 observed for the CYP subfamily genes (Fig. 6). It is notable that a putative TPS-e (Tg05g04000)  
33  
34 159 was constitutively expressed in all tissues examined and a putative TPS-c (Tg05g04010) was co-  
35  
36 160 regulated with a putative CYP76AH31 (Tg05g04020) (Fig. 6). From a biochemical perspective,  
37  
38 161 subfamily CYP76AH contains several P450s that are involved in (di)terpene specialized  
39  
40 162 metabolism and occur in close physical proximity in other species [19,22]. In another species of  
41  
42 163 Lamiaceae, *Salvia miltiorrhiza* Bunge, the best match for the teak TPS-c/CYP76AH31 cluster  
43  
44 164 was the SmCPS1/CYP76AH12 gene cluster (Fig. 6), which is involved in the biosynthesis of  
45  
46 165 tanshinone diterpenes and organized in several gene clusters, suggesting physical clustering is a  
47  
48 166 major mechanism regulating expression of genes involved in the same biosynthetic pathway in  
49  
50 167 plants [23].

## 50 169 **Conclusion**

51  
52  
53 170 In summary, we generated a chromosomal-scale assembly of the teak genome that, when  
54  
55 171 coupled with high-quality functional annotation, will facilitate the discovery of candidate genes  
56  
57 172 related to traits critical for sustainable production of teak and for anti-insecticidal natural  
58  
59 173 products. Furthermore, the high contiguity of our improved assembly will permit comparative

1  
2  
3  
4 174 genomics studies and exploration of physical gene clustering, facilitating discovery of key  
5  
6 175 biosynthetic pathways.

7  
8 176

9  
10 177 **Availability of supporting data**

11  
12 178 All sequences generated in this study, including PacBio long reads and Illumina short reads,  
13  
14 179 were deposited in the NCBI SRA under BioProject PRJNA493753. The genome assembly,  
15  
16 180 annotation files, and expression matrix can be accessed at Dryad (Provisional DOI:  
17  
18 181 doi:10.5061/dryad.77b2422). For review purposes, these data can be viewed through this  
19  
20 182 anonymous URL (<https://datadryad.org/review?doi=doi:10.5061/dryad.77b2422>).

21  
22 183

23  
24 184 **Abbreviations**

25  
26 185 Cetyl trimethylammonium bromide (CTAB), single molecule real time sequencing (SMRT  
27  
28 186 sequencing), custom repeat library (CRL), terpene synthase (TPS), di-terpene synthase (di-TPS),  
29  
30 187 Whole genome duplications (WGD), RNA-sequencing (RNA-seq), cytochrome P450 enzymes  
31  
32 188 (CYPs)

33  
34 189 **Competing interests**

35  
36 190 The authors have declared that no competing interests exists.

37  
38  
39 191 **Funding**

40  
41 192 Funds for this study were provided by a grant to CRB, ND, DS, and PS from the National  
42  
43 193 Science Foundation Plant Genome Research Program (IOS-1444499) and from Hatch funds to  
44  
45 194 CRB.

46  
47 195 **Author contributions**

48  
49  
50 196 C.R.B, B.H., and D.Z. designed the experiment, D.Z. and J.P.H. conducted genome assembly  
51  
52 197 and annotation, D.Z. generated expression matrix and physical clustering of TPSs/CYPs,  
53  
54 198 W.W.B. and S.R.J. conducted the TPS phylogeny and functional verification of 4 TPSs, G.G.  
55  
56 199 and T.K. conducted whole-genome duplication analysis, B.B. analyzed TPS expression, C.R.B.,  
57  
58 200 B.H., P.S., D.S., and N.D. provided intellectual insights and supervised the work. All authors  
59  
60 201 read and wrote part of the manuscript.

1  
2  
3  
4  
5  
6  
7  
8  
9  
10  
11  
12  
13  
14  
15  
16  
17  
18  
19  
20  
21  
22  
23  
24  
25  
26  
27  
28  
29  
30  
31  
32  
33  
34  
35  
36  
37  
38  
39  
40  
41  
42  
43  
44  
45  
46  
47  
48  
49  
50  
51  
52  
53  
54  
55  
56  
57  
58  
59  
60  
61  
62  
63  
64  
65

202 **Acknowledgements**

203 We thank Dr. David Nelson (The University of Tennessee, Health Science Center) for annotating  
204 the new P450s. We thank Krystle Wiegert-Rininger and Joshua Wood for taking care of the teak  
205 plants. We thank Brienne Vaillancourt for handling the data storage and submission and  
206 providing valuable comments on the manuscript.

207

1  
2  
3  
4  
5  
6  
7  
8  
9  
10  
11  
12  
13  
14  
15  
16  
17  
18  
19  
20  
21  
22  
23  
24  
25  
26  
27  
28  
29  
30  
31  
32  
33  
34  
35  
36  
37  
38  
39  
40  
41  
42  
43  
44  
45  
46  
47  
48  
49  
50  
51  
52  
53  
54  
55  
56  
57  
58  
59  
60  
61  
62  
63  
64  
65

208 **References**

209 1 Food and Agriculture Organization of the United Nations. Global teak trade in the  
210 aftermath of Myanmar’s log export ban. 2015.

211 2 Yasodha R, Vasudeva R, Balakrishnan S, et al. Draft genome of a high value tropical  
212 timber tree, Teak (*Tectona grandis* L. f): insights into SSR diversity, phylogeny and  
213 conservation. *DNA Res* 2018;25:409–419.

214 3 Sheffield’s Seed Company. Available at <https://sheffields.com/> Accessed March 7, 2017.

215 4 Doyle JJ. Isolation of plant DNA from fresh tissue. *Focus. Focus (Madison)* 1990;12:13–  
216 15.

217 5 Koren S, Walenz BP, Berlin K, et al. Canu: scalable and accurate long-read assembly via  
218 adaptive k-mer weighting and repeat separation. *Genome Res* 2017;27:722–736.

219 6 Pacfici Biosciences. SMRT tools. 2017

220 7 Walker BJ, Abeel T, Shea T, et al. Pilon: An Integrated Tool for Comprehensive  
221 Microbial Variant Detection and Genome Assembly Improvement. *PLoS One*  
222 2014;9:e112963.

223 8 Lieberman-Aiden E, van Berkum NL, Williams L, et al. Comprehensive mapping of long-  
224 range interactions reveals folding principles of the human genome. *Science*  
225 2009;326:289–293.

226 9 Putnam NH, O’Connell BL, Stites JC, et al. Chromosome-scale shotgun assembly using  
227 an in vitro method for long-range linkage. *Genome Res* 2016;26:342–350.

228 10 The UC Berkeley AMP Lab. Scalable Nucleotide Alignment Program. Available at  
229 <http://snap.cs.berkeley.edu>.

230 11 Simão FA, Waterhouse RM, Ioannidis P, et al. BUSCO: assessing genome assembly and  
231 annotation completeness with single-copy orthologs. *Bioinformatics* 2015;31:3210–3212.

232 12 Zhao D, Hamilton JP, Pham GM, et al. De novo genome assembly of *Camptotheca*  
233 *acuminata*, a natural source of the anti-cancer compound camptothecin. *Gigascience*  
234 2017;6:1–7.

1  
2  
3  
4 235 13 Smit A, Hubley R. *RepeatModeler Open-1.0*. 2008.  
5  
6 236 14 Stanke M, Waack S. Gene prediction with a hidden Markov model and a new intron  
7  
8 237 submodel. *Bioinformatics* 2003;19:ii215-ii225.  
9  
10 238 15 Campbell MA, Haas BJ, Hamilton JP, et al. Comprehensive analysis of alternative  
11  
12 239 splicing in rice and comparative analyses with Arabidopsis. *BMC Genomics* 2006;7:327.  
13  
14  
15 240 16 Edger PP, Heidel-Fischer HM, Bekaert M, et al. The butterfly plant arms-race escalated  
16  
17 241 by gene and genome duplications. *Proc Natl Acad Sci* 2015;112:8362–8366.  
18  
19 242 17 Barker MS, Dlugosch KM, Dinh L, et al. EvoPipes.net: Bioinformatic Tools for  
20  
21 243 Ecological and Evolutionary Genomics. *Evol Bioinforma* 2010;6:EBO.S5861.  
22  
23 244 18 Dudareva N, Klempien A, Muhlemann JK, et al. Biosynthesis, function and metabolic  
24  
25 245 engineering of plant volatile organic compounds. *New Phytol* 2013;198:16–32.  
26  
27 246 19 Boutanaev AM, Moses T, Zi J, et al. Investigation of terpene diversification across  
28  
29 247 multiple sequenced plant genomes. *Proc Natl Acad Sci U S A* 2015;112:E81-8.  
30  
31  
32 248 20 Mint Evolutionary Genomics Consortium. Phylogenomic Mining of the Mints Reveals  
33  
34 249 Multiple Mechanisms Contributing to the Evolution of Chemical Diversity in Lamiaceae.  
35  
36 250 *Mol Plant* 2018;11:1084–1096.  
37  
38 251 21 Pandey V, Singh AK, Sharma RP. Biodiversity of Insect Pests associated with Teak  
39  
40 252 (*Tectona grandis* L.f.) in Eastern Uttar Pradesh of India. *Res J For* 2010;4:136–144.  
41  
42 253 22 Zi J, Matsuba Y, Hong YJ, et al. Biosynthesis of lycosantalanol, a cis-prenyl derived  
43  
44 254 diterpenoid. *J Am Chem Soc* 2014;136:16951–16953.  
45  
46 255 23 Xu H, Song J, Luo H, et al. Analysis of the Genome Sequence of the Medicinal Plant  
47  
48 256 *Salvia miltiorrhiza*. *Mol Plant* 2016;9:949–952.  
49  
50 257  
51  
52  
53  
54  
55  
56  
57  
58  
59  
60  
61  
62  
63  
64  
65

1  
2  
3  
4  
5  
6  
7  
8  
9  
10  
11  
12  
13  
14  
15  
16  
17  
18  
19  
20  
21  
22  
23  
24  
25  
26  
27  
28  
29  
30  
31  
32  
33  
34  
35  
36  
37  
38  
39  
40  
41  
42  
43  
44  
45  
46  
47  
48  
49  
50  
51  
52  
53  
54  
55  
56  
57  
58  
59  
60  
61  
62  
63  
64  
65

258 **Figure legends**

259 Figure 1. Gene and repeat density across the 19 pseudomolecules in the assembly. Green dots  
260 denote telomere tracks.

261 Figure 2. Differential expression of tandem copies of genes in lignin biosynthetic pathway.  
262 stem12yr: stem secondary xylem of a 12-year-old teak tree; stem60yr: stem secondary xylem of  
263 a 60-year-old teak tree; branch12yr: branch secondary xylem of a 12-year-old teak tree;  
264 branch60yr: branch secondary xylem of a 60-year-old teak tree.

265 Figure 3. Maximum likelihood tree of peptide sequences of terpene synthase (TPS) family genes  
266 from the *Tectona grandis* (red branches), *Arabidopsis thaliana* (green branches), and *Eucalyptus*  
267 *grandis* (blue branches). Red dots denote teak TPSs expressed in stems.

268 Figure 4. Proposed diterpene pathway based on the functional verification.

269 Figure 5. Expression of terpene synthases (TPSs) in various tissues of teak. Six monoterpene  
270 synthases (clade a & b) and three putative sesquiterpene synthases (clade c) exhibited high  
271 expression in branches and stems of 12- and 60-year-old teak trees.

272 Figure 6. A physical cluster of TPS/CYP genes on pseudomolecule 5 and their expression in  
273 different tissues of teak. Horizontal arrows denote genes with their gene classification listed  
274 above and gene IDs below, where unfilled arrows denote partial genes and black arrows denote  
275 genes that are not TPS/CYP.

1  
2  
3  
4  
5  
6  
7  
8  
9  
10  
11  
12  
13  
14  
15  
16  
17  
18  
19  
20  
21  
22  
23  
24  
25  
26  
27  
28  
29  
30  
31  
32  
33  
34  
35  
36  
37  
38  
39  
40  
41  
42  
43  
44  
45  
46  
47  
48  
49  
50  
51  
52  
53  
54  
55  
56  
57  
58  
59  
60  
61  
62  
63  
64  
65

276 **Tables**

277 **Table 1.** Metrics of contigs assembled using PacBio reads.

| Metrics             | Initial assembly (bp) |
|---------------------|-----------------------|
| Total contigs       | 1,474                 |
| Total length        | 338,318,549           |
| Maximum contig size | 21,267,566            |
| Minimum contig size | 1,168                 |
| N50 contig size     | 3,749,470             |
| N90 contig size     | 52,675                |
| Average contig size | 229,524               |

  

| Contig size    | Total size (bp) | %Total assembly | # Contigs |
|----------------|-----------------|-----------------|-----------|
| ≥1 Mbp         | 248,187,558     | 73.37           | 64        |
| 0.5 - 1 Mbp    | 267,412,682     | 79.06           | 91        |
| 0.1 - 0.5 Mbp  | 291,028,790     | 86.04           | 198       |
| 0.05 - 0.1 Mbp | 305,851,391     | 90.42           | 420       |

278

279

280 **Table 2.** Whole genome shot-gun reads

| Sample name     | NCBI SRA Run ID | QC-passed reads | mapped                  | properly paired out of total reads |
|-----------------|-----------------|-----------------|-------------------------|------------------------------------|
| teak_TrueSeq_01 | SRR7984127      | 168,566,966     | 165,783,328<br>(98.35%) | 163,390,358<br>(97.40%)            |
| teak_TrueSeq_02 | SRR7984127      | 188,504,116     | 185,541,771<br>(98.43%) | 182,934,854<br>(97.15%)            |
| TEC_AA_01       | SRR7984129      | 371,978,214     | 364,473,434<br>(97.98%) | 357,722,188<br>(96.65%)            |
| TEC_AA_02       | SRR7984129      | 394,477,964     | 386,545,305<br>(97.99%) | 379,620,884<br>(96.72%)            |
| TEC_AB_01       | SRR7984130      | 89,116,777      | 87,087,277<br>(97.72%)  | 84,001,838<br>(94.93%)             |
| TEC_AB_02       | SRR7984130      | 81,436,054      | 79,540,000<br>(97.67%)  | 76,733,986<br>(94.89%)             |

281

282

283

284

285



1  
2  
3  
4  
5  
6  
7  
8  
9  
10  
11  
12  
13  
14  
15  
16  
17  
18  
19  
20  
21  
22  
23  
24  
25  
26  
27  
28  
29  
30  
31  
32  
33  
34  
35  
36  
37  
38  
39  
40  
41  
42  
43  
44  
45  
46  
47  
48  
49  
50  
51  
52  
53  
54  
55  
56  
57  
58  
59  
60  
61  
62  
63  
64  
65

286 **Table 3.** Metrics of the assembled scaffolds.

| Current assembly             |             |
|------------------------------|-------------|
| Total scaffolds              | 936         |
| Assembly size (bp)           | 338,300,341 |
| Maximum scaffold length (bp) | 20,661,910  |
| Minimum scaffold length (bp) | 1,168       |
| N50 scaffold size (bp)       | 16,483,567  |
| Average scaffold size (bp)   | 361,432     |

  

| Size cutoff             | Size (bp)   | % Assembly size | # Scaffolds |
|-------------------------|-------------|-----------------|-------------|
| Scaffolds $\geq$ 1 Mb   | 304,435,280 | 89.99           | 19          |
| Scaffolds $\geq$ 100 kb | 308,724,809 | 91.26           | 41          |
| Scaffolds $\geq$ 50 kb  | 314,467,503 | 92.96           | 134         |
| Scaffolds $\geq$ 10 kb  | 338,276,936 | 99.99           | 931         |

287  
288  
289  
290

1  
2  
3  
4  
5  
6  
7  
8  
9  
10  
11  
12  
13  
14  
15  
16  
17  
18  
19  
20  
21  
22  
23  
24  
25  
26  
27  
28  
29  
30  
31  
32  
33  
34  
35  
36  
37  
38  
39  
40  
41  
42  
43  
44  
45  
46  
47  
48  
49  
50  
51  
52  
53  
54  
55  
56  
57  
58  
59  
60  
61  
62  
63  
64  
65

291 **Additional files**

292 **Supplementary tables**

293 **Table S1.** BUSCO results.

294 This is available as a separate XLS file.

295 **Table S2.** Mapping of RNA-seq reads to the assembly.

296 This is available as a separate XLS file.

297 **Table S3.** Genes involved in the core phenylpropanoid biosynthetic pathway and their  
298 expression in teak.

299 This is available as a separate XLS file.

300 **Table S4.** Tandem clusters of candidate terpene synthases (TPSs) and cytochrome P450  
301 enzymes (CYPs) in teak.

302 This is available as a separate XLS file.

303

304 **Supplementary figures**

305 **Figure S1.** Inference of ancient WGDs in *Tectona grandis*. (A) Histogram ( $K_S$  plot) showing the  
306 age distribution of putative paralogous gene pairs overlaid with mixture models of inferred WGD  
307 events. The mixture model with an inferred peak at  $K_S = 0.60$  (red) was corroborated by SiZer  
308 analysis (Chaudhuri and Marron, 1999), while modeled peaks at  $K_S = 0.22, 1.36$  (blue) were not.  
309 (B) SiZer map displaying significant features in the observed  $K_S$  distribution at varying  
310 bandwidths. As indicated in the key, colors signify either a significant increase (blue), significant  
311 decrease (red), or no significant change (purple) in the data distribution.

312 **Figure S2.** Activities of diterpene synthases after transient expression in *Nicotiana benthamiana*.  
313 On the left are total ion chromatograms of hexane extracts from plant leaves. On the right are  
314 mass spectra from individual peaks. Controls express CfDXS and CfGGPPS, but no recombinant  
315 TPS. Hexane extract from the moss *Physcomitrella patens* was used as a standard for *ent*-  
316 kaurene. *Zea mays* ZmAN2 (Genbank: AY562491) is a known *ent*-copalyl diphosphate synthase.

1  
2  
3  
4  
5  
6  
7  
8  
9  
10  
11  
12  
13  
14  
15  
16  
17  
18  
19  
20  
21  
22  
23  
24  
25  
26  
27  
28  
29  
30  
31  
32  
33  
34  
35  
36  
37  
38  
39  
40  
41  
42  
43  
44  
45  
46  
47  
48  
49  
50  
51  
52  
53  
54  
55  
56  
57  
58  
59  
60  
61  
62  
63  
64  
65

317 *Coleus forskohlii* CfTPS1 (Genbank: KF444506), and CfTPS3 (Genbank: KF444508) are known  
318 (+)-copalyl diphosphate and miltiradiene synthases, respectively.

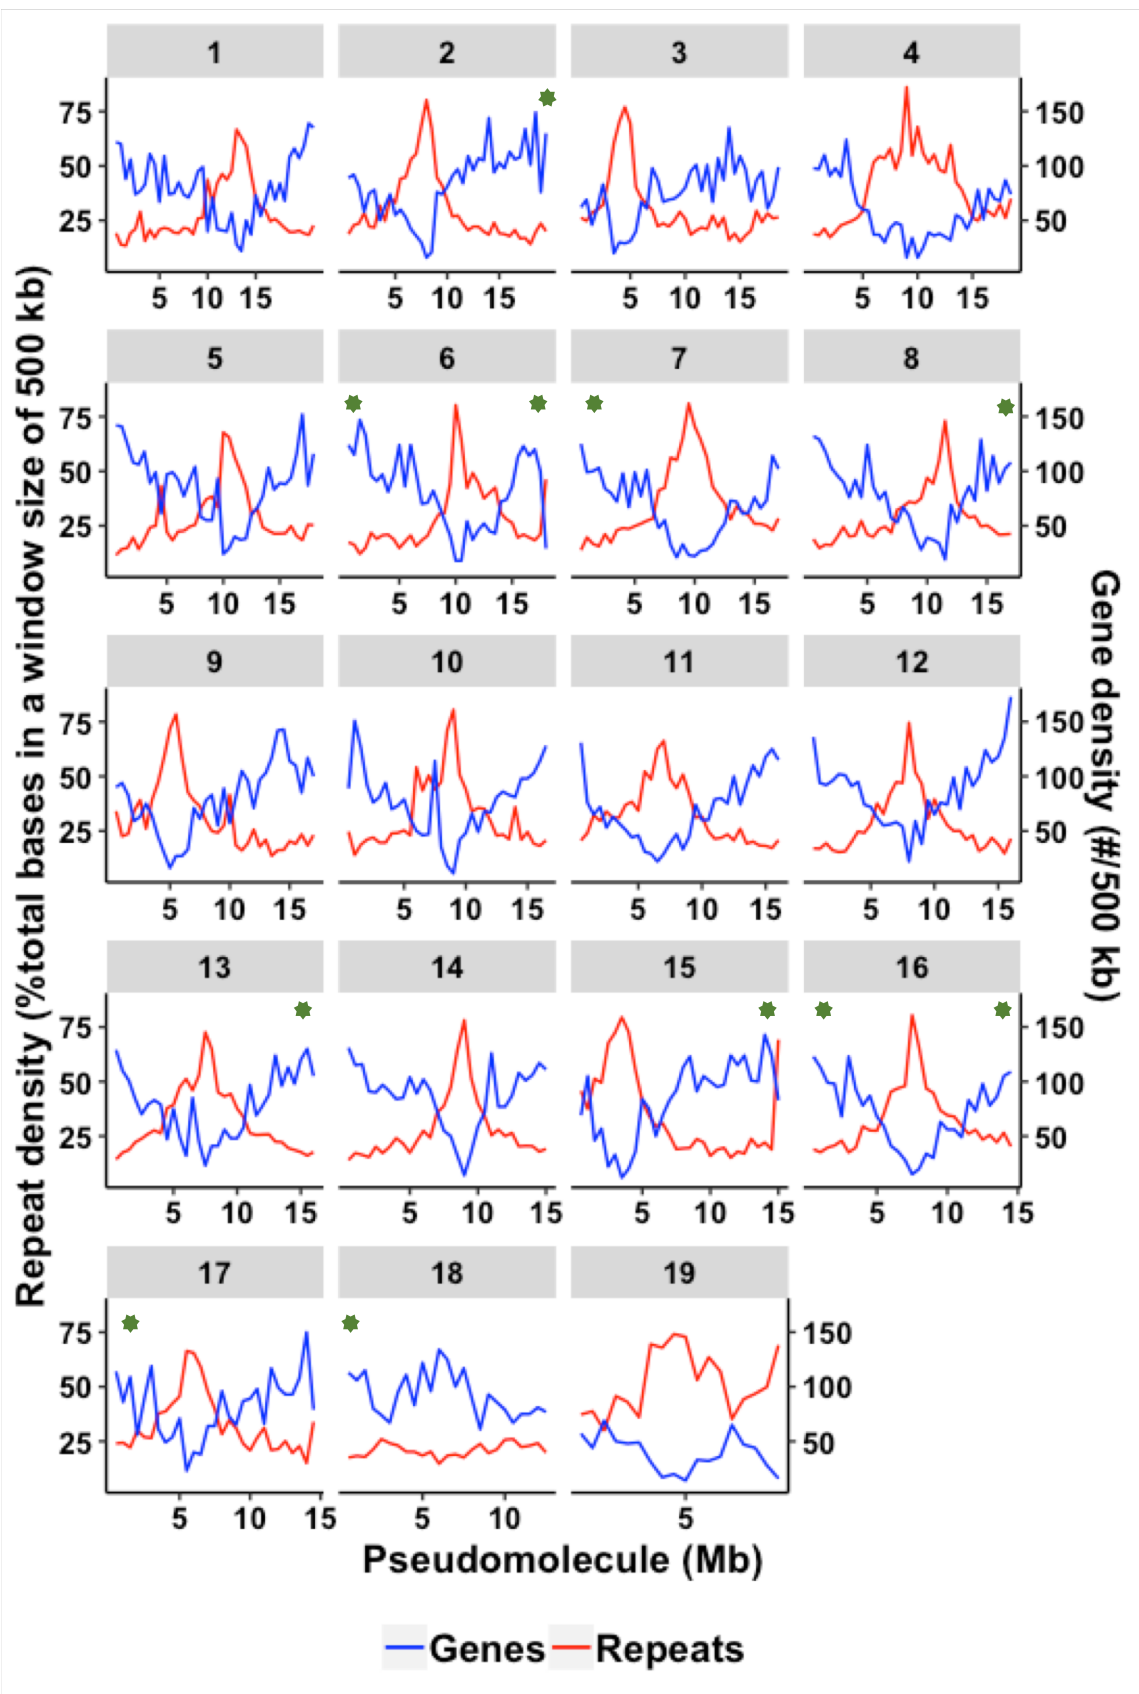

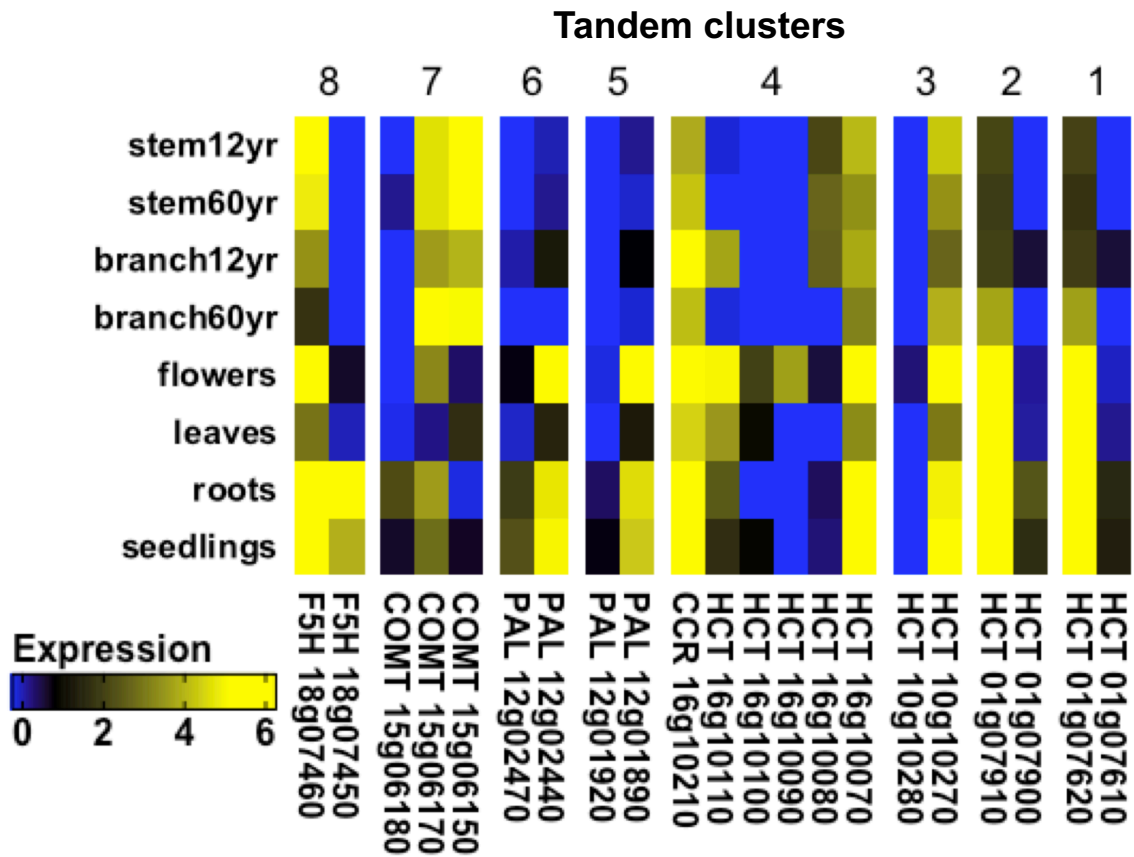

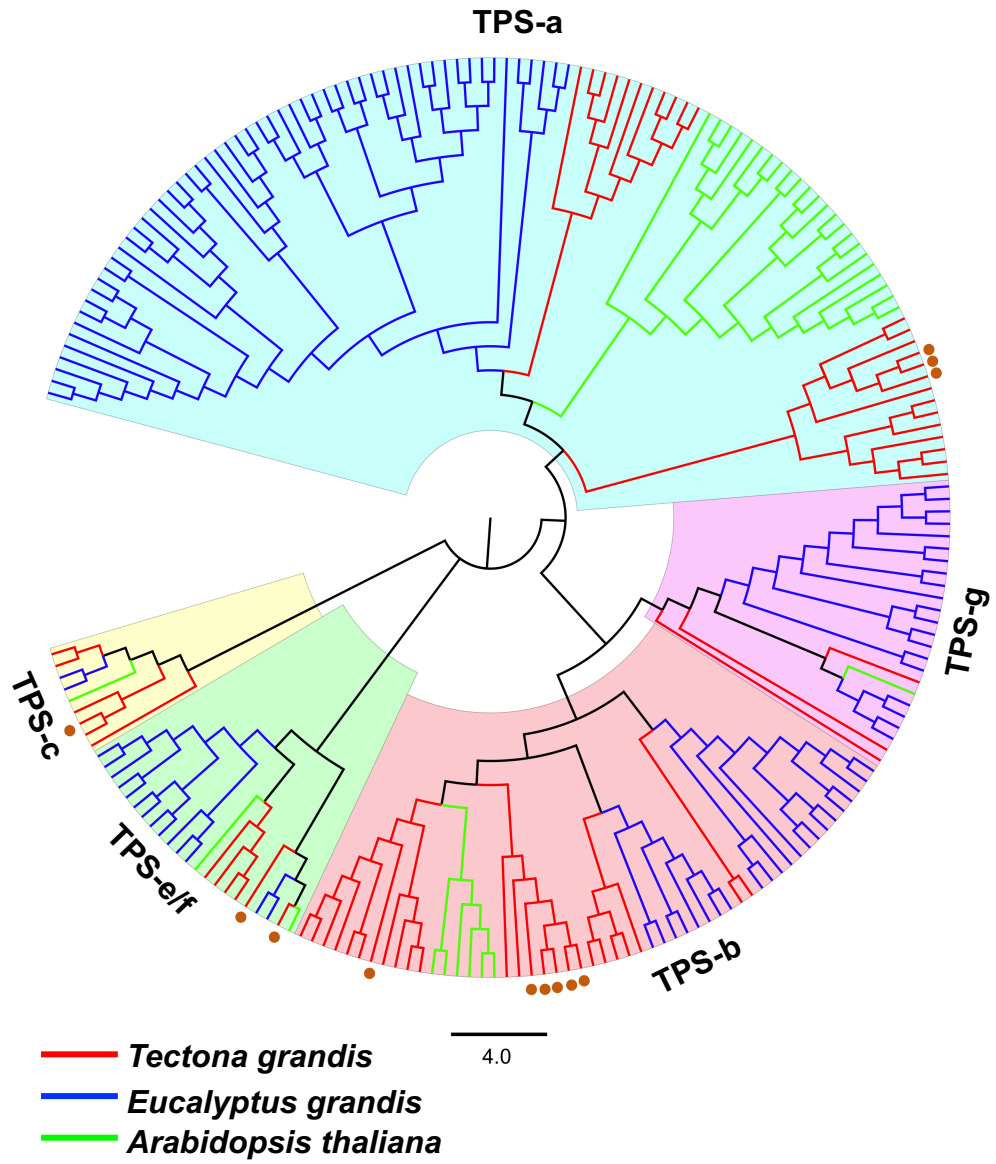

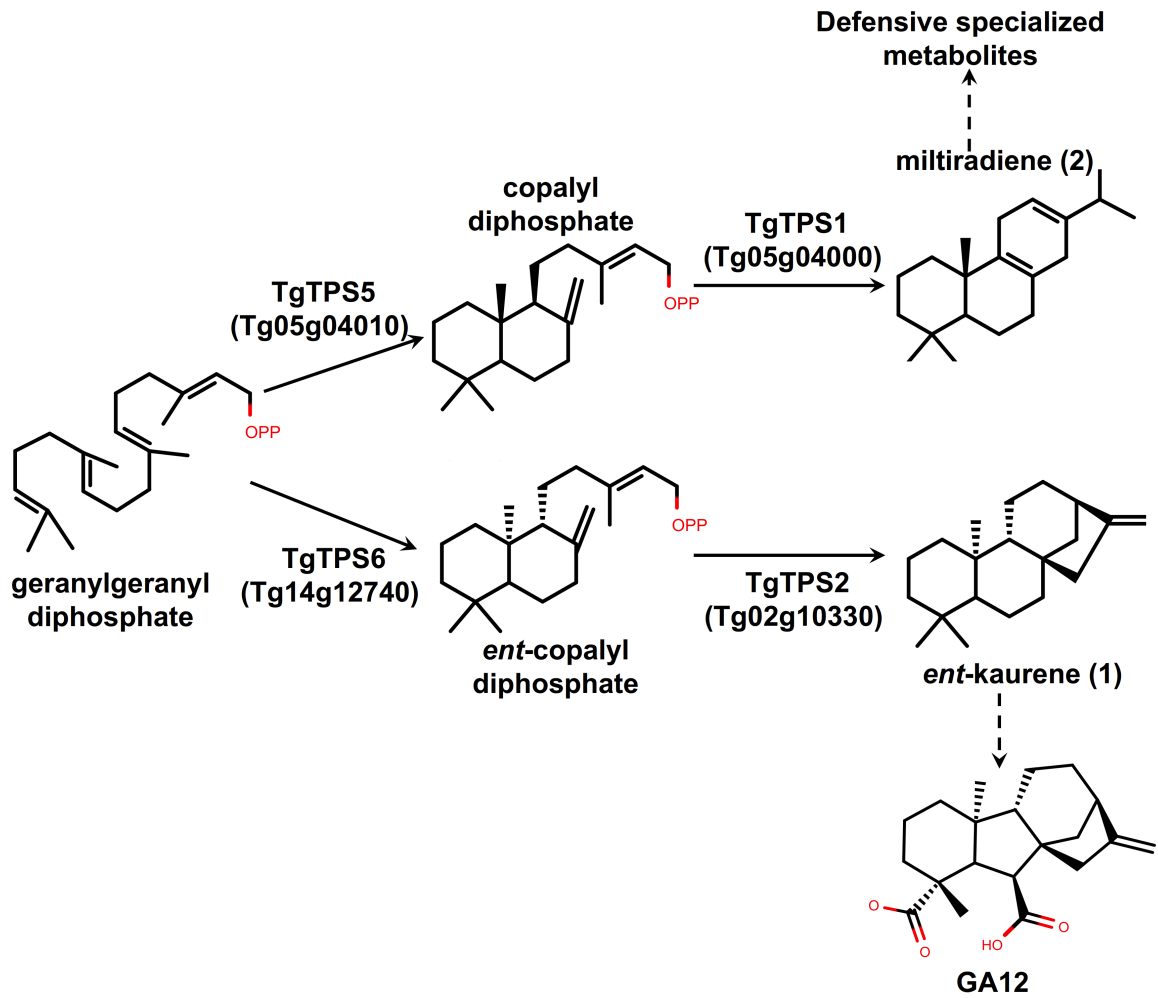

Figure 5

[Click here to download Figure Figure 5.pdf](#)

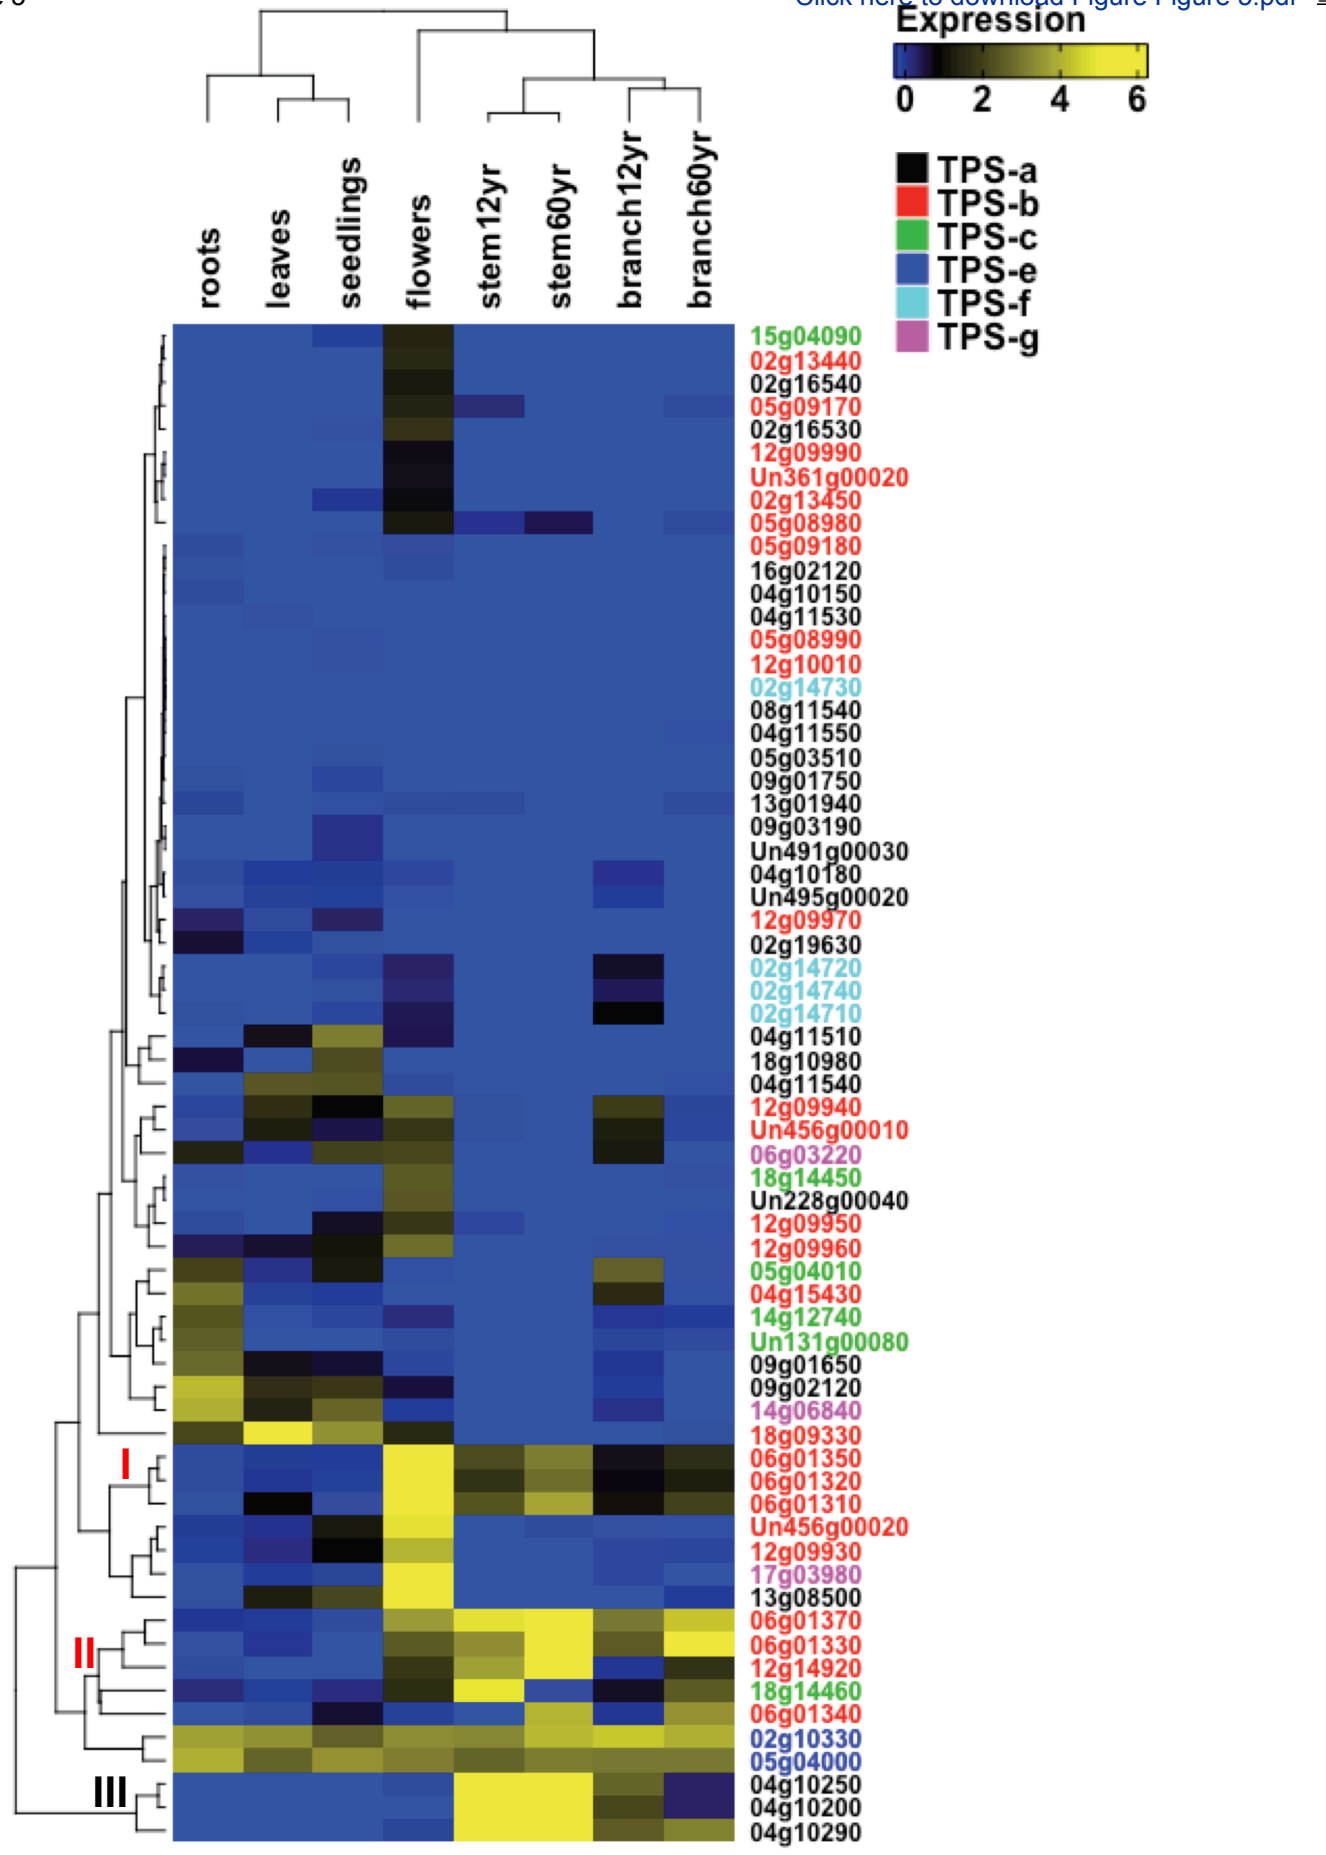



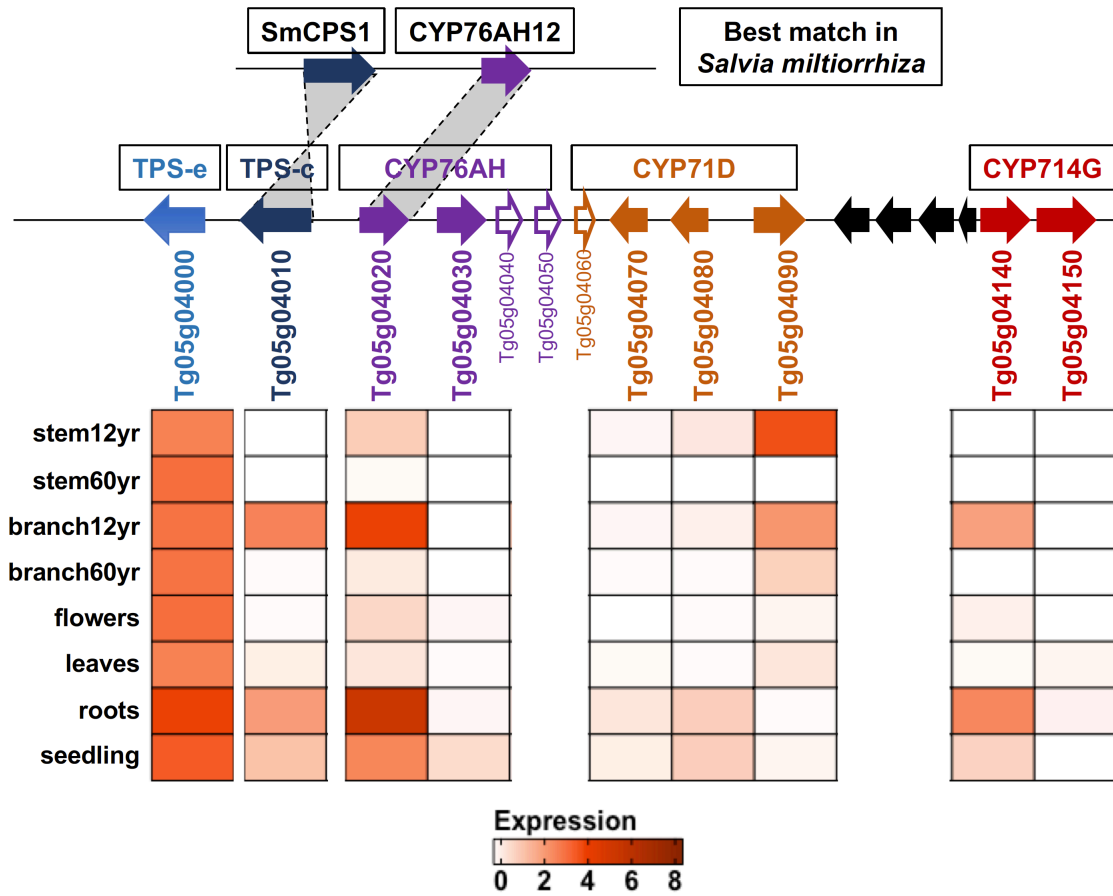



Click here to access/download  
**Supplementary Material**  
Table S1.xlsx



Click here to access/download  
**Supplementary Material**  
Table S2.xlsx



Click here to access/download  
**Supplementary Material**  
Table S3.xlsx



Click here to access/download  
**Supplementary Material**  
Table S4.xlsx



Click here to access/download  
**Supplementary Material**  
Zhao-Teak-sup\_RB\_DZ.docx



Supplement: giz005_giga-d-18-00458_original_submission.pdf [file giz005_giga-d-18-00458_original_submission.pdf]
